# Supplementary material for: Synergistic Effect of QNZ, an Inhibitor of NF-κB Signaling, and Bone Morphogenetic Protein 2 on Osteogenic Differentiation in Mesenchymal Stem Cells through Fibroblast-Induced Yes-Associated Protein Activation
Source: MDPI journal article supplement (doi:10.3390/ijms24097707), 2023-04-22
Supplement: s1 [file s1]

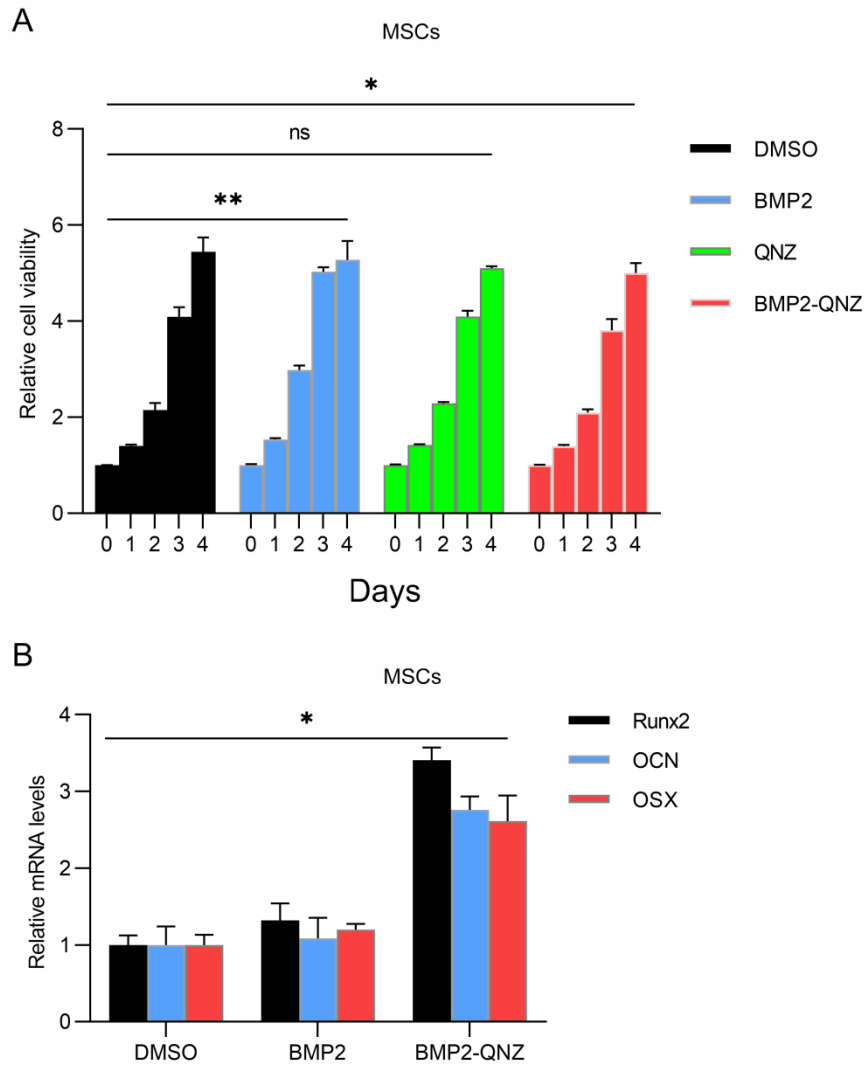

**Figure S1. QNZ reversing the inhibition of fibroblasts in the BMP2-mediated osteoblast differentiation of MSCs.**

(A) About 3,000 MSCs cultured in each well of 96 well plates with a control vehicle, 200 ng/mL of BMP2 or 10  $\mu$ M QNZ, for the indicated time. Relative cell viability (OD values at 450 nm of each group normalized to the vehicle treated group) was measured with a cell-counting kit. At least three experiments were conducted and analyzed (n=3). \*:  $P < 0.05$ ; \*\*:  $P < 0.01$

(B) Relative mRNA levels of *Runx2*, *Ocn* and *Osx* after MSCs were directly co-cultured with MEFs and treated with control vehicle, 200 ng/mL of BMP2 or 10  $\mu$ M QNZ. \*:  $P < 0.05$

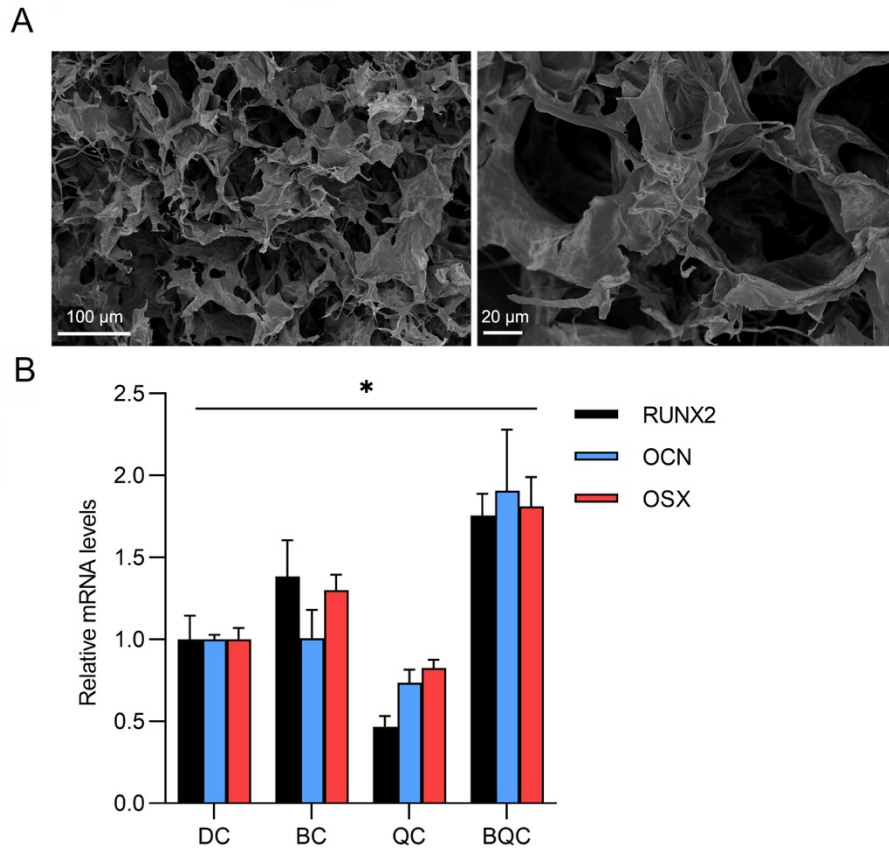

**Figure S2. BMP2/QNZ/Collagen I biomaterials enhanced osteoblast differentiation of MSCs when MSCs co-cultured with MEFs.**

(A) SEM observation illustrating that BMP2/QNZ/Collagen I biomaterials had several pores.

(B) Relative mRNA levels of *Runx2*, *Ocn* and *Osx* after MSCs were directly co-cultured with MEFs and treated with DC, BC, QC and BQC. \*:  $P < 0.05$
